# Supplementary material for: DEPP Deficiency Contributes to Browning of White Adipose Tissue
Source: MDPI journal article supplement (doi:10.3390/ijms23126563), 2022-06-12
Supplement: s1 [file s1]

## Supplementary Information

### DEPP deficiency contributes to browning of white adipose tissue

Fusheng Guo<sup>1\*</sup>, Yanlin Zhu<sup>1\*</sup>, Yaping Han<sup>1</sup>, Xuhui Feng<sup>1</sup>, Zhifu Pan<sup>1</sup>, Ying He<sup>2</sup>, Yong Li<sup>1,#</sup>, Lihua Jin<sup>1,3,#</sup>

\* These authors contributed equally to this work.

# Correspondences: [yongli@xmu.edu.cn](mailto:yongli@xmu.edu.cn) (Y.L.); [lihjin@coh.org](mailto:lihjin@coh.org) (L.J.)

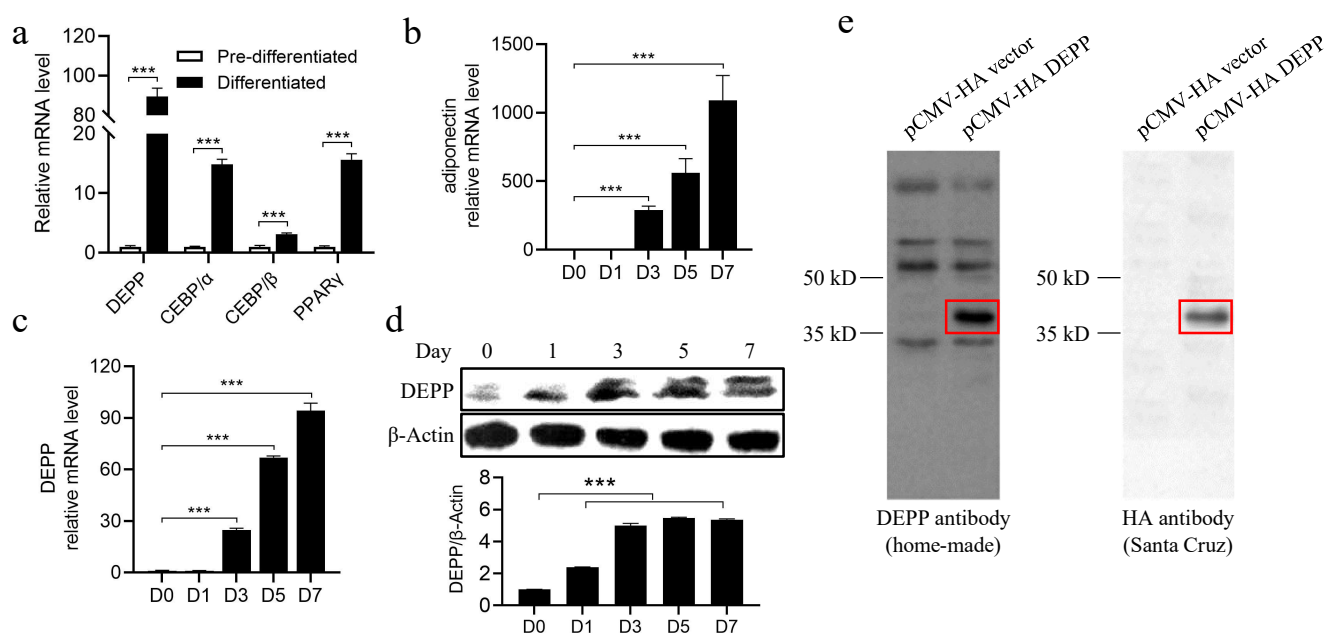

**Supplemental Figure S1 DEPP expression increased in a differentiation-dependent manner in 3T3-L1 cell.**

(a) Relative mRNA levels of DEPP and adipocyte differentiation - related genes. (b-c) Dynamic mRNA levels of Adiponectin (b) and DEPP (c) during adipocyte differentiation. (d) Western blot analysis and quantitative level of DEPP protein during differentiation in 3T3-L1 cell. (e) Evaluation of homemade anti-DEPP antibody. pCMV-HA-DEPP was transfected into HEK293T, and the cell lysate was used for Western blot analysis comparing homemade anti-DEPP antibody and commercial available anti-HA antibody, respectively. The band labeled in the red box were DEPP bands. In (a), the results are presented as the means  $\pm$  SD, Two-tailed Student's t-test, \*\*\*P < 0.001. In b, c and d, the results are presented as the means  $\pm$  SD, One-way ANOVA with Tukey's post-hoc test, \*\*\*P < 0.001.

|                     |                                                             |
|---------------------|-------------------------------------------------------------|
| mouse-DEPP-siRNA-1  | AAAA GGAAGAAACCACAGCACATCG TTGGATCCAA CGATGTGCTGTGGTTTCTTCC |
| mouse-DEPP-siRNA-2  | AAAA GGGCTTCCTTTAGAGGAGACA TTGGATCCAA TGTCTCCTCTAAAGGAAGCCC |
| mouse-DEPP-siRNA-3  | AAAA GCTTCCTTTAGAGGAGACAGT TTGGATCCAA ACTGTCTCCTCTAAAGGAAGC |
| mouse-DEPP-siRNA-4  | AAAA GGAGACAGTCTTTACCCATCT TTGGATCCAA AGATGGGTAAAGACTGTCTCC |
| mouse-DEPP-siRNA-6  | AAAA GTCTTTACCCATCTAGACTCC TTGGATCCAA GGAGTCTAGATGGGTAAAGAC |
| mouse-DEPP-siRNA-7  | AAAA GCAGTATCCTAGGTACTCTCT TTGGATCCAA AGAGAGTACCTAGGATACTGC |
| mouse-DEPP-siRNA-9  | AAAA GACAGTCTAGCTCCACAATG TTGGATCCAA CATTGTGGGAGCTAGACTGTC  |
| mouse-DEPP-siRNA-10 | AAAA GCTCCACAATGCGACTTTGA TTGGATCCAA TCAAAGTCGCATTGTGGGAGC  |

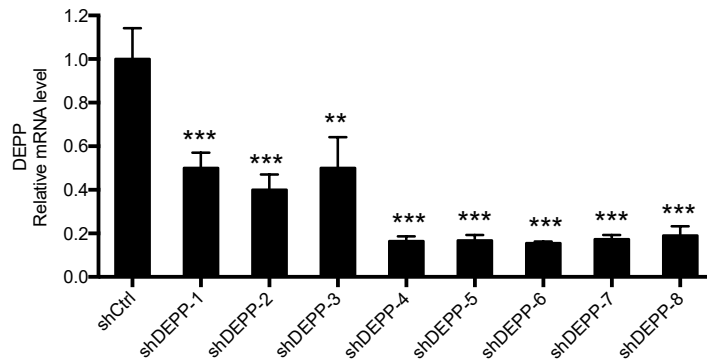

**Supplemental Figure S2 shRNA-DEPP sequences and silence efficacy identification.** The sequences designed for DEPP silence were listed. The silence efficacies of DEPP were determined by Q-PCR. n = 3 biological replicates, and the results are presented as the means  $\pm$  SD, One-way ANOVA with Tukey's post-hoc test, \*\*P < 0.01, \*\*\*P < 0.001 vs shCtrl.

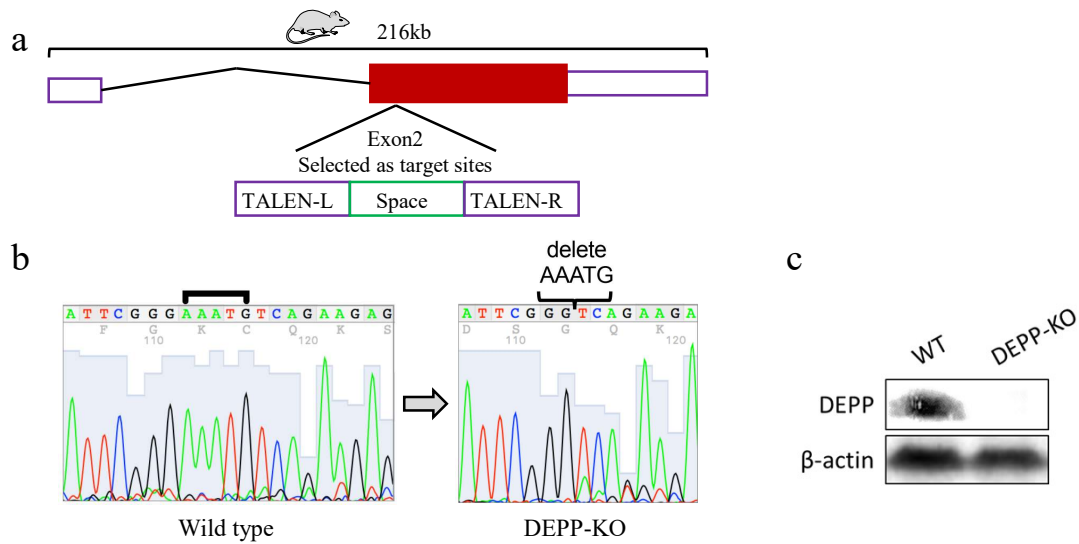

**Supplemental Figure S3 DEPP knockout mice establishment in C57BL/6.** A. TALENs technology was used to create DEPP-knockout mice through inducing the deletion of five bases on the second exon of *Depp* gene. B. Genomic DNA was isolated from mouse tails. Target site was amplified by PCR and then sequenced. The left image indicates the sequencing from wild type mice and the right image indicates the deletion of AAATG motif in *Depp* KO mice. This deletion results in a frameshift to achieve DEPP deficiency *in vivo*. C. Western blot analysis on the embryonic fibroblasts isolated from *Depp*<sup>-/-</sup> mice.

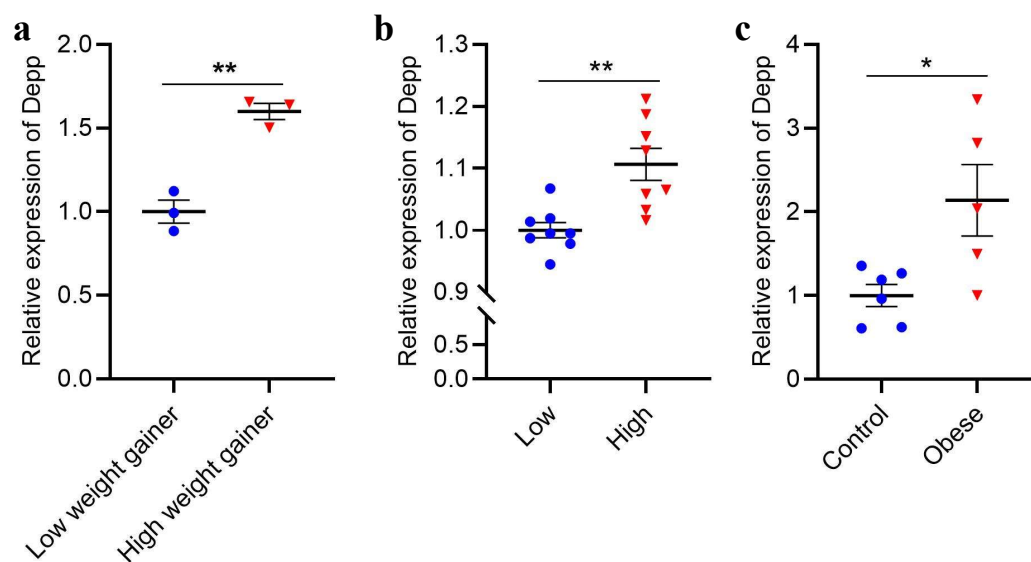

**Supplementary Figure S4 GEO profiles of DEPP in adipose tissue.** Higher Depp expression level in (a) iWAT of mice under 4 week's high saturated fat diet feeding (GEO profile ID: 30164547), (b) iWAT of mice T2D model (GEO profile ID: 75593942), and (c) visceral adipose tissue of obese individuals (GEO profile ID: 30164547). Two-tailed Student's t-test: \*P < 0.05, \*\*P < 0.01.

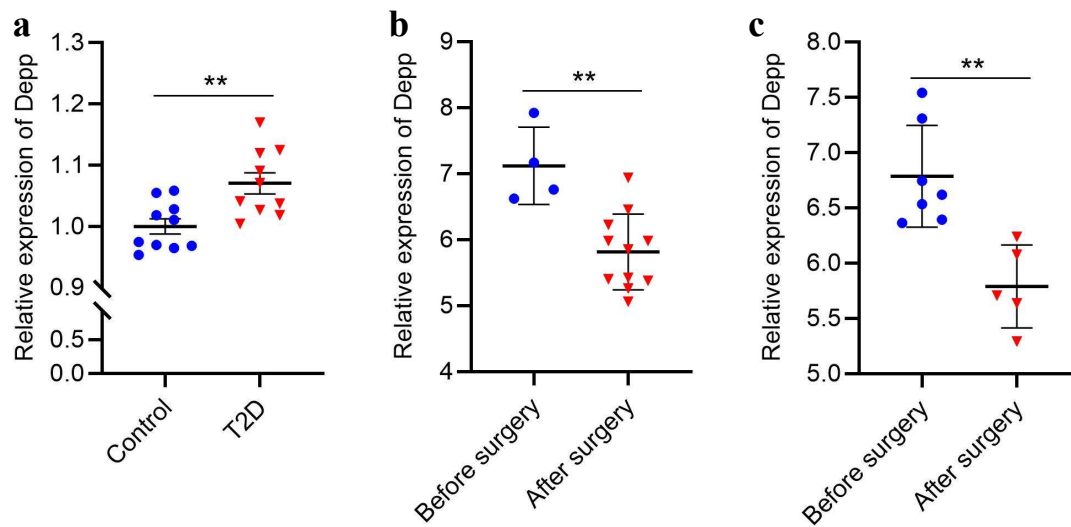

**Supplementary Figure S5 GEO profiles of DEPP in muscle and liver tissue.** (a) Higher Depp expression levels in skeletal muscle myotube in T2D individuals (GEO profile ID: 64654601). (b-c) Downregulated Depp expression in liver of individuals with obese (b) or obese with NAFLD (c) after bariatric surgery (GEO profile ID: 7933203).

**Supplementary Table S1. The sequences of primers used in Q-PCR.**

| <b>Gene name</b> | <b>Forward primer (5'-3')</b> | <b>Reverse primer (5'-3')</b> |
|------------------|-------------------------------|-------------------------------|
| GAPDH            | GCCTTCCGTGTTCTACCC            | TGCCTGCTTCACCACCTTC           |
| DEPP             | TGAGCACTCTCTGGGAAGAAAAC       | GATCACTGGGAGGTGCAAATAGA       |
| CEBPa            | CCAAGAAGTCGGTGGACAAGA         | CGGTCATTGTCACTGGTCAACT        |
| CEBPβ            | CGCCTTATAAACCTCCCGCT          | TGGCCACTTCCATGGGTCTA          |
| Adiponectin      | GAATCATTATGACGGCAGCAC         | CCAGATGGAGGAGCACAGAG          |
| Cidea            | ATCACAACTGGCCTGGTTACG         | TACTACCCGGTGTCCATTTCT         |
| Cox8b            | GAACCATGAAGCCAACGACT          | GCGAAGTTCACAGTGGTTCC          |
| PGC-1α           | AGCCGAGGACACGAGGAAAG          | TGGCCTGAATCTGTGGAAGAAC        |
| PPARγ            | CATTCTGGCCACCAACTTC           | TCAAAGGAATGCGAGTGGTCTT        |
| PRDM16           | CAGCACGGTGAAGCCATTC           | GCGTGCATCCGCTTGTG             |
| Resistin         | AAGAACCTTTCATTTCCCCTCCT       | GTCCAGCAATTTAAGCCAATGTT       |
| UCP1             | CACCTTCCCGCTGGACACT           | CCCTAGGACACCTTTATACCTAATGG    |
| WDM1             | TCAACCCAGTCAGAGCCAAC          | GCCCAGGCAGTAGTCATTGT          |
| Agt              | GCACCCTGGTCTCTTTCTACC         | TGTGTCCATCTAGTCGGGAGG         |
| Itga6            | GGCGACCGAGGCCAAG              | GTGTCCAGGTTGAAGGCTGT          |
| PPARα            | GCGTACGGCAATGGCTTTAT          | GAACGGCTTCCTCAGGTTCTT         |

**Supplementary Table S2. Raw data for Supplementary Fig. 1b-c.**

|             |    |       |       |        |             |          |
|-------------|----|-------|-------|--------|-------------|----------|
| Actin       | D0 | 16.07 | 16.20 |        |             |          |
|             |    | 16.41 |       |        |             |          |
|             |    | 16.12 |       |        |             |          |
|             | D1 | 16.09 |       |        |             |          |
|             |    | 16.16 |       |        |             |          |
|             |    | 15.85 |       |        |             |          |
|             | D3 | 16.35 |       |        |             |          |
|             |    | 16.24 |       |        |             |          |
|             |    | 15.73 |       |        |             |          |
|             | D5 | 16.24 |       |        |             |          |
|             |    | 16.15 |       |        |             |          |
|             |    | 15.76 |       |        |             |          |
|             | D7 | 16.24 |       |        |             |          |
|             |    | 16.26 |       |        |             |          |
|             |    | 16.32 |       |        |             |          |
| DEPP        | D0 | 32.45 | 32.64 | -0.06  | 1.044877153 | 1.052975 |
|             |    | 32.31 |       | -0.54  | 1.457335791 |          |
|             |    | 33.17 |       | 0.61   | 0.656712278 |          |
|             | D1 | 32.58 |       | 0.05   | 0.968170696 | 1.124152 |
|             |    | 32.2  |       | -0.40  | 1.322560146 |          |
|             |    | 32.18 |       | -0.11  | 1.081724666 |          |
|             | D3 | 28.26 |       | -4.53  | 23.1563078  | 24.80093 |
|             |    | 27.95 |       | -4.73  | 26.59961268 |          |
|             |    | 27.55 |       | -4.62  | 24.64688356 |          |
|             | D5 | 26.65 |       | -6.03  | 65.49592909 | 66.88611 |
|             |    | 26.49 |       | -6.10  | 68.75216947 |          |
|             |    | 26.15 |       | -6.05  | 66.41021819 |          |
|             | D7 | 26.04 |       | -6.64  | 99.96376492 | 93.91833 |
|             |    | 26.29 |       | -6.41  | 85.23259388 |          |
|             |    | 26.17 |       | -6.59  | 96.55863211 |          |
| Adiponectin | D0 | 25.94 | 26.01 | 0.06   | 0.959264119 | 1.000577 |
|             |    | 26.22 |       | 0.00   | 1           |          |
|             |    | 25.87 |       | -0.06  | 1.042465761 |          |
|             | D1 | 27.74 |       | 1.84   | 0.279321785 | 0.416073 |
|             |    | 26.86 |       | 0.89   | 0.539614118 |          |
|             |    | 26.88 |       | 1.22   | 0.429282718 |          |
|             | D3 | 18.19 |       | -7.97  | 250.7315962 | 290.4817 |
|             |    | 17.93 |       | -8.12  | 278.2041248 |          |
|             |    | 17.12 |       | -8.42  | 342.509454  |          |
|             | D5 | 16.48 |       | -9.57  | 760.0760682 | 561.0726 |
|             |    | 17.24 |       | -8.72  | 421.6786008 |          |
|             |    | 16.6  |       | -8.97  | 501.4631924 |          |
|             | D7 | 15.59 |       | -10.46 | 1408.554822 | 1086.504 |
|             |    | 16    |       | -10.07 | 1074.909884 |          |
|             |    | 16.53 |       | -9.60  | 776.0468821 |          |
